# Supplementary material for: The affinity of copper(ii) ions towards l-amino acids in the solid-state: a simple route towards mixed complexes
Source: Royal Society of Chemistry journal article supplement (doi:10.1039/d0ce00687d), 2020-01-01
Supplement: d0ce00687d1.pdf [file d0ce00687d1.pdf]

# The affinity of copper(II) ions towards L-amino acids in the solid-state: a simple route towards mixed complexes

Kristina Smokrović,<sup>a</sup> Ivica Đilović\*<sup>a</sup> and Dubravka Matković - Čalogović<sup>a</sup>

July 1, 2020

[<sup>a</sup>] University of Zagreb, Faculty of Science, Department of Chemistry, Horvatovac 102a, HR-10000 Zagreb, Croatia

**Corresponding authors:**

[\*] E-mail: ivica.djilovic@chem.pmf.hr

## Contents

|          |                                                                                |           |
|----------|--------------------------------------------------------------------------------|-----------|
| <b>1</b> | <b>Synthesis</b>                                                               | <b>2</b>  |
| 1.1      | In solution . . . . .                                                          | 2         |
| 1.2      | Mechanochemical synthesis . . . . .                                            | 2         |
| 1.3      | Comparison of mechanochemical and solution synthesis protocol . . . . .        | 3         |
| <b>2</b> | <b>Crystallographic data for the compound Cu(L-His)(L-Pro)·2H<sub>2</sub>O</b> | <b>4</b>  |
| 2.1      | Asymmetric unit . . . . .                                                      | 4         |
| 2.2      | Table of crystallographic information . . . . .                                | 5         |
| 2.3      | Crystal structure solution . . . . .                                           | 6         |
| <b>3</b> | <b>PXRD data analysis</b>                                                      | <b>7</b>  |
| 3.1      | PXRD data for the complexes of [Cu(aa) <sub>2</sub> ] type . . . . .           | 7         |
| 3.2      | PXRD data for the complexes of [Cu(aa1)(aa2)] type . . . . .                   | 10        |
| <b>4</b> | <b>References</b>                                                              | <b>17</b> |

# Synthesis

## 1.1 In solution

Copper(II) hydroxide was prepared from the aqueous solution of tetraamminecopper(II) sulfate by precipitation with sodium hydroxide.<sup>1,2</sup>

### Single complexes, Cu(aa)<sub>2</sub>

Freshly prepared copper(II) hydroxide (1.00 mmol, 97.6 mg) and the desired amino acid (2.00 mmol, table Table S1), were added to 5.0 mL of distilled water. The resulting mixture is heated and stirred for 2 h at 90 °C, and left to cool down to room temperature (?? Scheme S1).\*

In the case of low solubility(L-Phe, L-Trp, L-Gln and L-Asn) of the complex the prepared sample can be simply filtered off and washed out with a dilute aqueous solution of sodium hydroxide (10%) to remove excess of unreacted amino acid. For the complexes that are readily soluble(L-His and L-Pro), 5.0 mL of ethanol (96%) should be added as precipitant. The resulting dark blue solution is then reduced to the half of the initial volume and left in a cool and dark place until the complex precipitates.

### Mixed complexes, Cu(aa1)(aa2)

Freshly prepared copper(II) hydroxide (1.00 mmol, 97.6 mg) and an equimolar amount (1.00 mmol, masses are listed in table Table S1), of each amino acid (**aa1** and **aa2**) are added to 5.0 mL of distilled water. The resulting mixture was heated and stirred for 2 h at 90 °C, and left to cool down to room temperature.

**Table S1:** Mass of each amino acid used in solution synthesis of Cu(**aa**)<sub>2</sub> (2<sup>nd</sup> column) and Cu(**aa1**)(**aa2**)(3<sup>rd</sup> column) complexes.

| aa    | <i>m</i> (aa)/mg    |              |
|-------|---------------------|--------------|
|       | Cu(aa) <sub>2</sub> | Cu(aa1)(aa2) |
| L-Phe | 330.38              | 165.19       |
| L-Trp | 408.46              | 204.23       |
| L-His | 310.32              | 155.16       |
| L-Pro | 230.26              | 115.13       |
| L-Gln | 292.30              | 146.15       |
| L-Asn | 264.24              | 132.12       |

## 1.2 Mechanochemical synthesis

All milling experiments were made in the Retsch MM 200 using two 7 mm steel balls (1.4 g each) in the poly(methyl)methacrylate (PMMA, or Plexiglas) 14 mL jar, at 25 Hz for 30 min. For liquid-assisted grinding experiments 40 µL of 50 % ethanol mixture (  $\eta$ -values in table Table S2) was added to the reactants.

**Table S2:**  $\eta$ -values for 50% aqueous ethanol solution used for the LAG experiments.

| $\eta$ / $\mu\text{L mg}^{-1}$ | L-Phe | L-Trp | L-His | L-Pro | L-Gln | L-Asn |
|--------------------------------|-------|-------|-------|-------|-------|-------|
| L-Phe                          | 0.093 | 0.048 | 0.054 | 0.061 | 0.056 | 0.058 |
| L-Trp                          |       | 0.079 | 0.049 | 0.054 | 0.050 | 0.052 |
| L-His                          |       |       | 0.098 | 0.063 | 0.057 | 0.060 |
| L-Pro                          |       |       |       | 0.122 | 0.065 | 0.068 |
| L-Gln                          |       |       |       |       | 0.103 | 0.061 |
| L-Asn                          |       |       |       |       |       | 0.111 |

\*We tried the same procedure using L-Trp and copper salts that contain poorly coordinating anions (such as perchlorate or nitrate anions). The amino acid was dissolved in an aqueous solution containing an equimolar amount of sodium hydroxide. This solution was then cooled and the solution of the copper(II) salt was added stepwise and with stirring, otherwise precipitation of copper(II) oxide occurred. For the reasons we already discussed in the manuscript, we decided not to use other salts in both synthetic approaches.

Neat or liquid-assisted grinding (NG and LAG) of reactants, a single type of **aa** and freshly prepared copper(II) hydroxide in 2:1 molar ratio, resulted in the formation of the corresponding  $\text{Cu}(\text{aa})_2$  complexes. As evidenced by the analysis of the PXRD patterns (Figures S2-S7), products were obtained in high yield.

For competitive milling experiments, the stoichiometry of 1:2:2 molar ratio of the reactants ( $\text{Cu}(\text{OH})_2$ , **aa1**, and **aa2** respectively) was used. This stoichiometry results in three possible outcomes. In the first outcome, one amino acid is preferred and the PXRD analysis shows a  $\text{Cu}(\text{aa1})_2$  complex and unreacted **aa2**. In the second possible outcome a mixed complex  $\text{Cu}(\text{aa1})(\text{aa2})$  is formed, both amino acids can be observed in the powder diffraction pattern. In the third possible, and the most complicated, case both  $\text{Cu}(\text{aa1})_2$  and  $\text{Cu}(\text{aa2})_2$  are present as well as each amino acid. In this case molar ratio of resulting complexes does not have to be 1, since the affinity of each amino acid towards copper(II) is not equal.

### 1.3 Comparison of mechanochemical and solution synthesis protocol

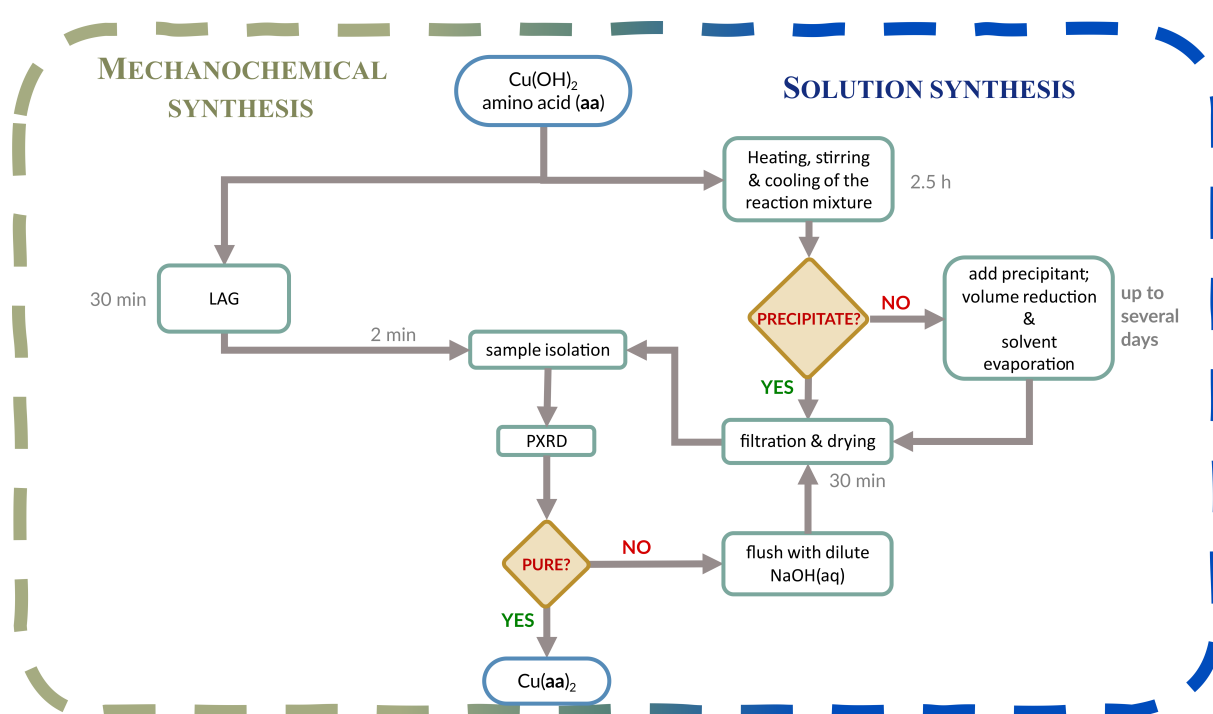

**Scheme S1:** Schematic overview of mechanochemical and solution synthesis of  $\text{Cu}(\text{aa})_2$  complexes.

## 2 Crystallographic data for the compound $\text{Cu}(\text{L-His})(\text{L-Pro}) \cdot 2\text{H}_2\text{O}$

### 2.1 Asymmetric unit

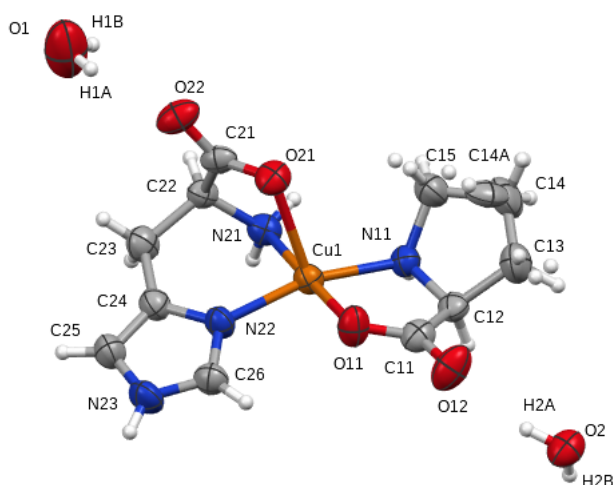

**Figure S1:** ORTEP plot of an asymmetric unit of  $\text{Cu}(\text{L-His})(\text{L-Pro}) \cdot 2\text{H}_2\text{O}$  with the atom labeling scheme. Thermal ellipsoids are plotted at a 50 % probability. Hydrogen atoms are drawn as white spheres of arbitrary size.

**Table S3:** Selected bond lengths for  $\text{Cu}(\text{L-His})(\text{L-Pro})$

| Atom 1 | Atom 2 | Bond Length (Å) |
|--------|--------|-----------------|
| Cu1    | O11    | 1.950(4)        |
| O21    | Cu1    | 2.285(3)        |
| Cu1    | N22    | 1.978(4)        |
| Cu1    | N21    | 2.000(4)        |
| Cu1    | N11    | 2.005(3)        |

**Table S4:** Selected bond angles for  $\text{Cu}(\text{L-His})(\text{L-Pro})$

| Atom1 | Atom2 | Atom3 | Angle (°)  |
|-------|-------|-------|------------|
| N21   | Cu1   | N11   | 95.37(14)  |
| N11   | Cu1   | O21   | 104.90(16) |
| N21   | Cu1   | O21   | 76.13(12)  |
| O11   | Cu1   | N11   | 83.47(14)  |
| O11   | Cu1   | N21   | 178.76(15) |
| O11   | Cu1   | N22   | 91.09(14)  |
| O11   | Cu1   | O21   | 103.73(13) |
| N22   | Cu1   | N11   | 164.31(15) |
| N22   | Cu1   | N21   | 90.14(14)  |
| N22   | Cu1   | O21   | 90.67(13)  |
| C12   | N11   | Cu1   | 109.7(2)   |
| C15   | N11   | Cu1   | 116.5(3)   |

**Table S5:** List of hydrogen bond parameters for Cu(L-His)(L-Pro)

| Donor    | Acceptor | D-H (Å) | H...A (Å) | D...A (Å) | D-H...A (°) | Type           |
|----------|----------|---------|-----------|-----------|-------------|----------------|
| N11-H11  | O12      | 0.98    | 2.341     | 3.002     | 124.0       | intermolecular |
| N11-H11  | O22      | 0.98    | 2.589     | 3.360     | 135.6       | intermolecular |
| N21-H21A | O21      | 0.89    | 2.717     | 3.359     | 130.0       | intermolecular |
| N21-H21A | O2       | 0.89    | 2.401     | 3.173     | 145.2       | intermolecular |
| N21-H21B | O2       | 0.89    | 2.071     | 2.935     | 163.5       | intermolecular |
| N23-H23  | O22      | 0.86    | 2.088     | 2.873     | 151.4       | intermolecular |
| O2-H2A   | O12      | 0.85    | 1.900     | 2.734     | 166.4       | intermolecular |
| O2-H2B   | O21      | 0.85    | 1.900     | 2.743     | 171.3       | intermolecular |
| O1-H1A   | O22      | 0.85    | 2.081     | 2.880     | 156.4       | intermolecular |
| O1-H1B   | O11      | 0.85    | 2.357     | 2.997     | 132.4       | intermolecular |
| O1-H1B   | O12      | 0.85    | 2.479     | 3.221     | 146.4       | intermolecular |

## 2.2 Table of crystallographic information

**Table S6:** Crystal data and structure refinement for Cu(L-His)(L-Pro)

| Compound                                                     | Cu(L-His)(L-Pro) · 2H <sub>2</sub> O                                                       |
|--------------------------------------------------------------|--------------------------------------------------------------------------------------------|
| Empirical formula                                            | C <sub>11</sub> H <sub>20</sub> CuN <sub>4</sub> O <sub>6</sub>                            |
| Formula weight                                               | 367.85                                                                                     |
| Temperature/ K                                               | 293(2)                                                                                     |
| Crystal system                                               | monoclinic                                                                                 |
| Space group                                                  | <i>P</i> 2 <sub>1</sub>                                                                    |
| <i>a</i> / Å                                                 | 9.7066(6)                                                                                  |
| <i>b</i> / Å                                                 | 8.1806(4)                                                                                  |
| <i>c</i> / Å                                                 | 10.3710(6)                                                                                 |
| $\alpha$ / °                                                 | 90                                                                                         |
| $\beta$ / °                                                  | 114.199(7)                                                                                 |
| $\gamma$ / °                                                 | 90                                                                                         |
| Volume/ Å <sup>3</sup>                                       | 751.15(8)                                                                                  |
| <i>Z</i>                                                     | 2                                                                                          |
| $\rho_{calc}$ / g/cm <sup>3</sup>                            | 1.626                                                                                      |
| $\mu$ / mm <sup>-1</sup>                                     | 1.489                                                                                      |
| <i>F</i> (000)                                               | 382.0                                                                                      |
| Crystal size/ mm                                             | 0.333 × 0.286 × 0.094                                                                      |
| Radiation                                                    | MoK $\alpha$ ( $\lambda$ = 0.71073 Å)                                                      |
| 2 $\theta$ range for data collection/°                       | 8.416 to 53.98                                                                             |
|                                                              | $-12 \leq h \leq 12$                                                                       |
| Index ranges                                                 | $-10 \leq k \leq 10$                                                                       |
|                                                              | $-13 \leq l \leq 12$                                                                       |
| Reflections collected                                        | 6231                                                                                       |
| Independent reflections                                      | 3261 [ <i>R</i> <sub>int</sub> = 0.0323, <i>R</i> <sub><math>\sigma</math></sub> = 0.0460] |
| Data/restraints/parameters                                   | 3261/2/214                                                                                 |
| Goodness-of-fit on <i>F</i> <sup>2</sup>                     | 1.027                                                                                      |
| Final <i>R</i> indexes [ <i>I</i> ≥ 2 $\sigma$ ( <i>I</i> )] | <i>R</i> <sub>1</sub> = 0.0334, <i>wR</i> <sub>2</sub> = 0.0781                            |
| Final <i>R</i> indexes [all data]                            | <i>R</i> <sub>1</sub> = 0.0403, <i>wR</i> <sub>2</sub> = 0.0815                            |
| Largest diff. peak/hole / e / Å <sup>-3</sup>                | 0.58/ − 0.29                                                                               |
| Flack parameter                                              | −0.003(10)                                                                                 |

## 2.3 Crystal structure solution

The crystal and molecular structures of the complex  $[\text{Cu}(\text{L-His})(\text{L-Pro})] \cdot 2\text{H}_2\text{O}$  (table Table S6) were determined using single-crystal X-ray diffraction data collected at room temperature. Diffracted intensities were collected on an Oxford Diffraction Xcalibur diffractometer with Sapphire3 CCD detector using graphite-monochromatic  $\text{MoK}_\alpha$  radiation. Data sets were collected using  $\phi$ -scans. CrysAlisPro system software<sup>3</sup> was used for data collection, cell refinement, and data reduction.

The structure of the synthesised compound was solved by direct methods and refined using the SHELXT<sup>4</sup> and SHELXL<sup>5</sup> programs, respectively. The refinement procedure by full-matrix least squares methods based on  $F^2$  values against all reflections included anisotropic displacement parameters for all non-H atoms. Proline side-chain disorder was modelled in two positions (major part with 68.11% occupancy and 31.89% for the minor part). The positions of H-atoms each riding on carbon and nitrogen atoms were determined on stereochemical grounds. Hydrogen atoms on water molecules were modelled using distance restraints (DFIX), and oriented with H-O bonds oriented towards the closest, chemically reasonable hydrogen bond acceptor.

The SHELX programs were operated within the Olex2 crystallographic suite<sup>6</sup>. Geometrical calculations and molecular graphics were done with PLATON<sup>7</sup>, MERCURY<sup>8</sup>, and PYMOL<sup>9</sup>. Supplementary crystallographic data sets for the structure are available through the Cambridge Structural Data base with deposition number 1999476.

Copy of this information may be obtained free of charge from the director, CCDC, 12 Union Road, Cambridge, CB2 1EZ, UK (fax: +44 1223 336 033; email: deposit@ccdc.cam.ac.uk or <http://www.ccdc.cam.ac.uk>).

### 3 PXRD data analysis

PXRD data for as-synthesized samples was collected on PANalytical Aeris diffractometer (Bragg-Brentano geometry, zero background sample holder, Ni-filtered CuK radiation with the X-ray tube operating 7.5 mA and 40 kV). Diffractograms were visualized using *ggplot2* package<sup>10</sup> in R-Studio<sup>11</sup> program suite.

#### 3.1 PXRD data for the complexes of [Cu(aa)<sub>2</sub>] type

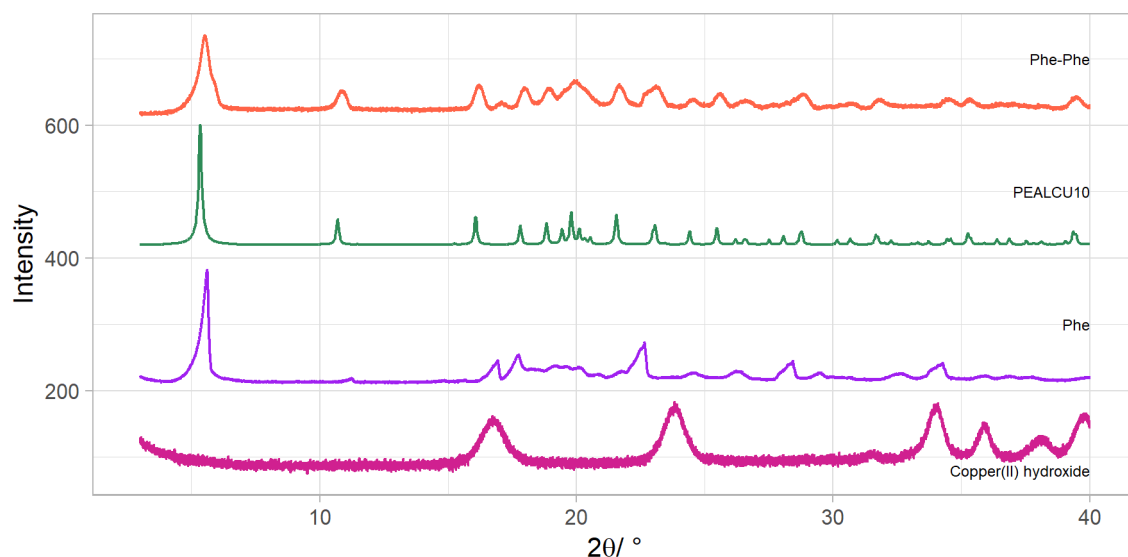

**Figure S2:** PXRD patterns of mechanochemically prepared samples of L-Phe with Cu(OH)<sub>2</sub> compared to the calculated patterns derived from the belonging CSD entries(refcode).

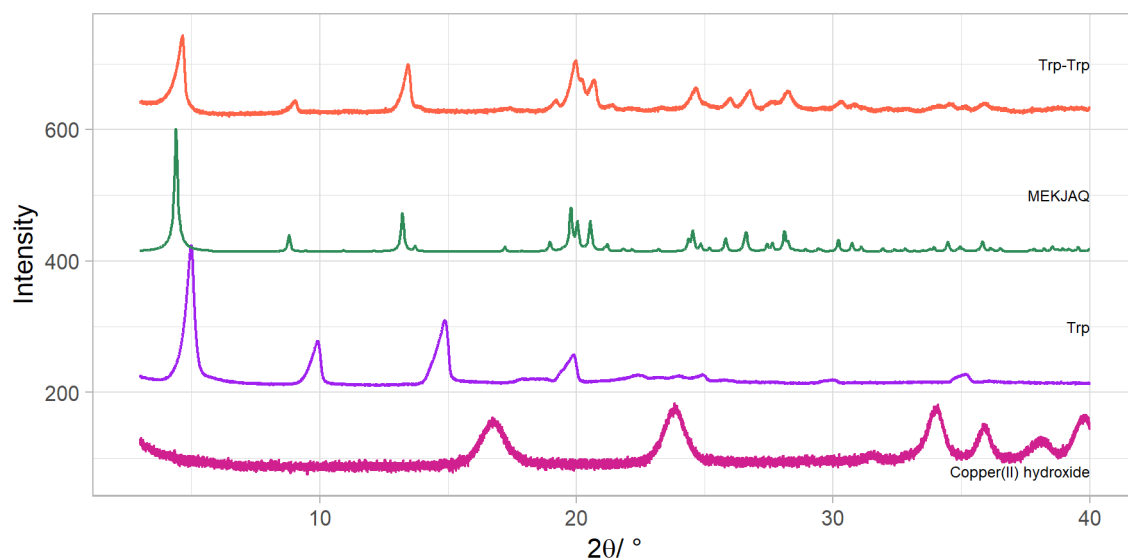

**Figure S3:** PXRD patterns of mechanochemically prepared samples of L-Trp with Cu(OH)<sub>2</sub> compared to calculated patterns derived from the belonging CSD entries(refcode).

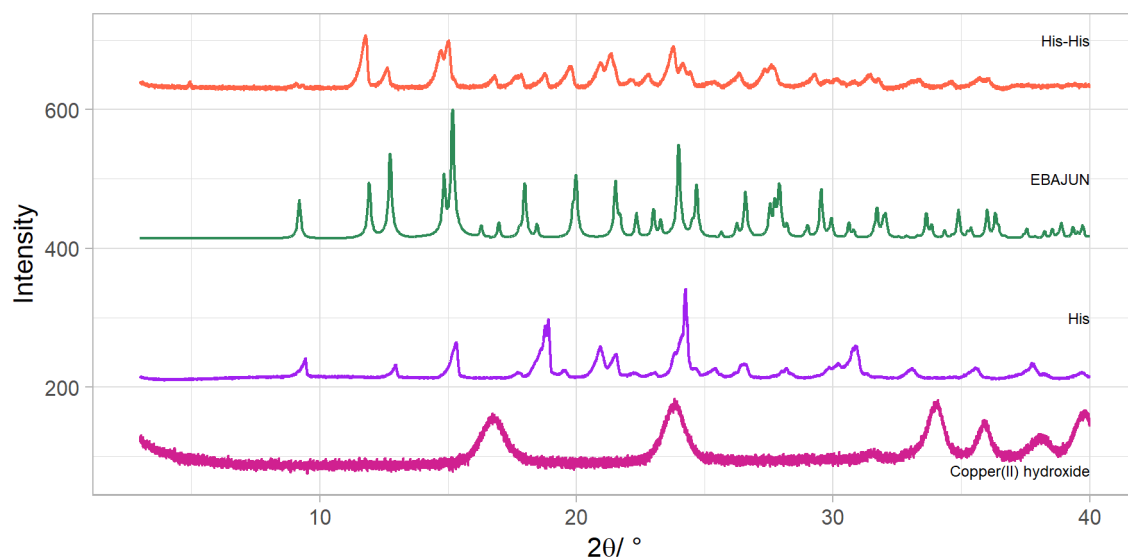

**Figure S4:** PXRD patterns of mechanochemically prepared samples of L-His with  $\text{Cu}(\text{OH})_2$  compared to calculated patterns derived from the belonging CSD entries(refcode).

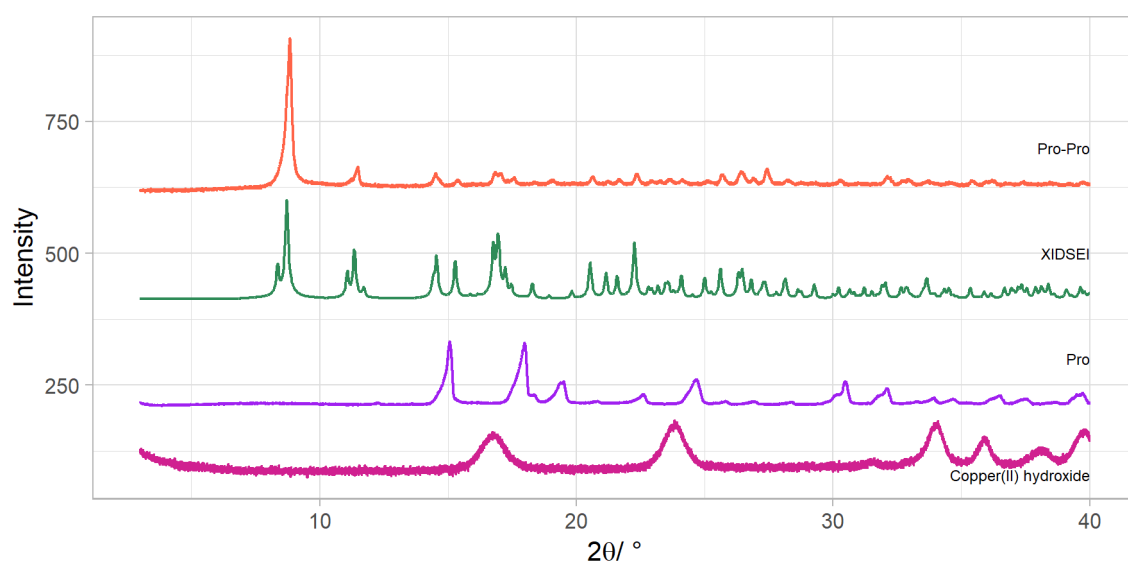

**Figure S5:** PXRD patterns of mechanochemically prepared samples of L-Pro with  $\text{Cu}(\text{OH})_2$  compared to calculated patterns derived from the belonging CSD entries(refcode).

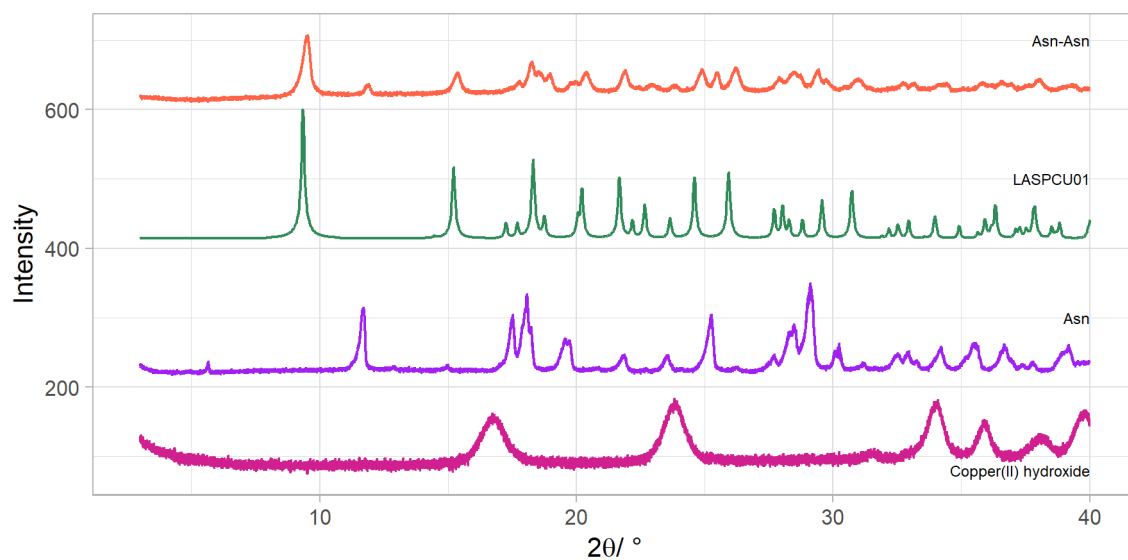

**Figure S6:** PXRD patterns of mechanochemically prepared samples of L-Asn with  $\text{Cu}(\text{OH})_2$  compared to calculated patterns derived from the belonging CSD entries(refcode).

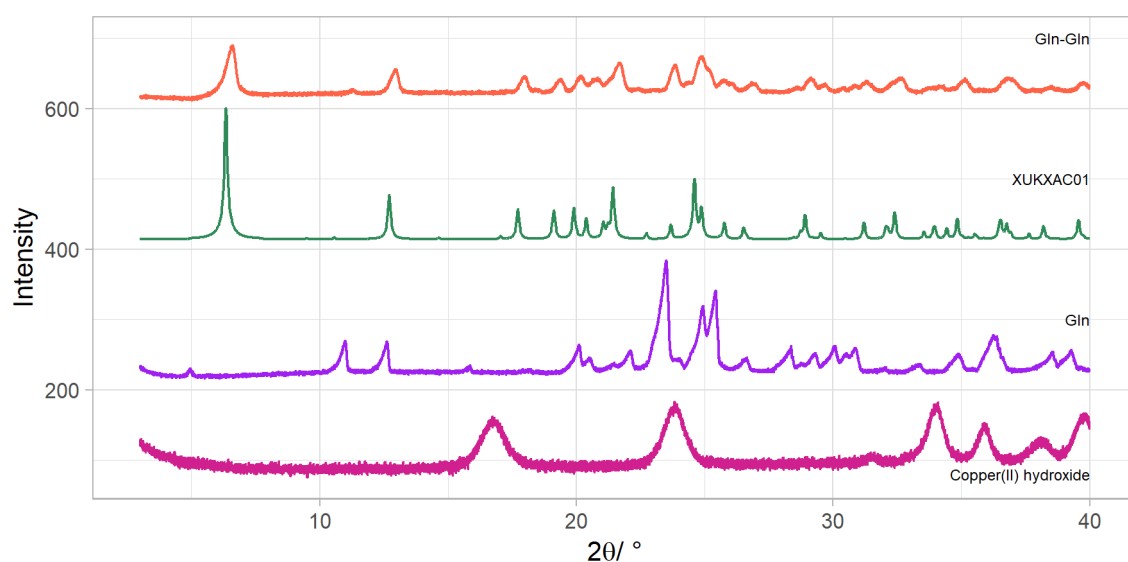

**Figure S7:** PXRD patterns of mechanochemically prepared samples of L-Gln with  $\text{Cu}(\text{OH})_2$  compared to calculated patterns derived from the belonging CSD entries(refcode).

### 3.2 PXRD data for the complexes of [Cu(aa1)(aa2)] type

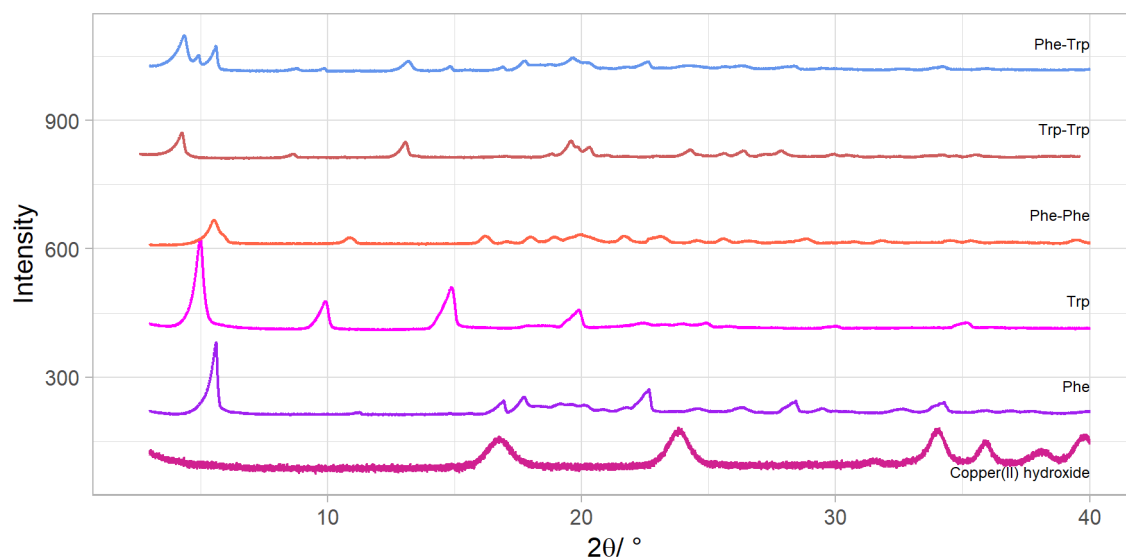

**Figure S8:** PXRD patterns of mechanochemically prepared samples of L-Phe and L-Trp with  $\text{Cu}(\text{OH})_2$  compared to calculated patterns derived from the belonging CSD entries(refcode).

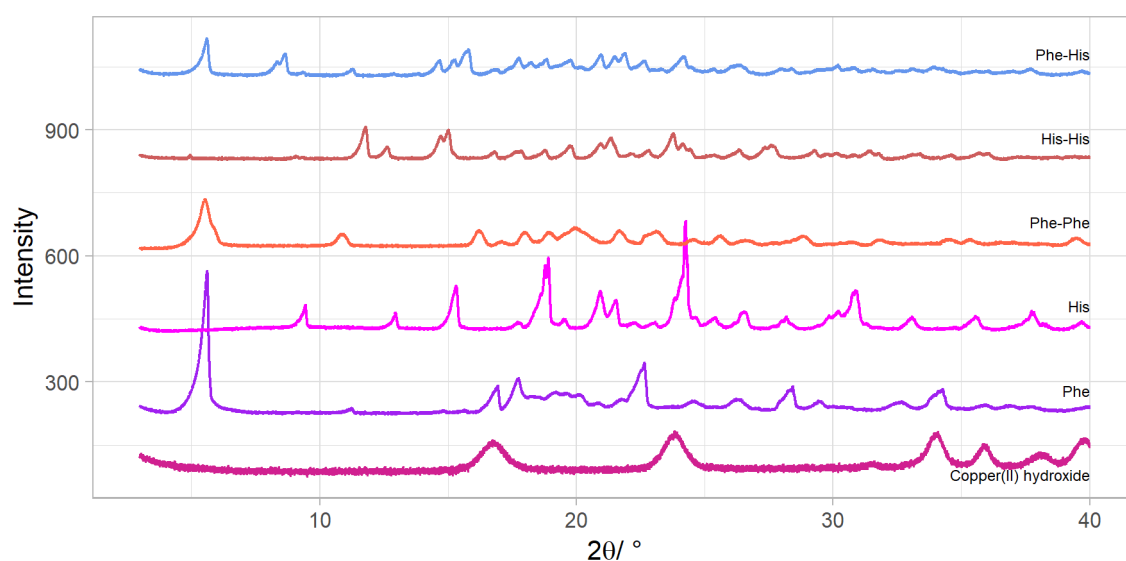

**Figure S9:** PXRD patterns of mechanochemically prepared samples of L-Phe and L-His with  $\text{Cu}(\text{OH})_2$  compared to calculated patterns derived from the belonging CSD entries(refcode).

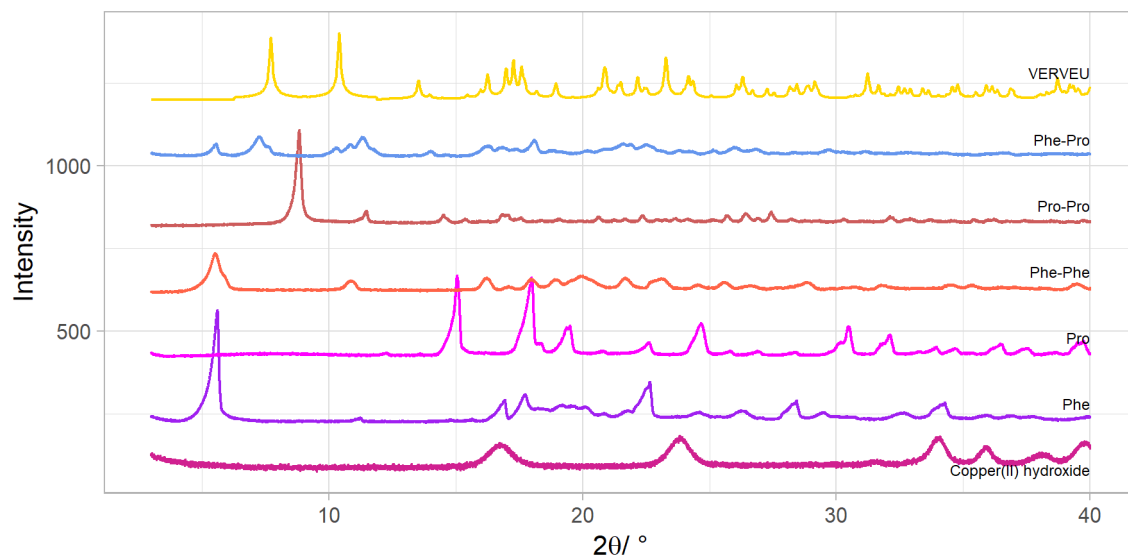

**Figure S10:** PXRD patterns of mechanochemically prepared samples of L-Phe and L-Pro with  $\text{Cu}(\text{OH})_2$  compared to calculated patterns derived from the belonging CSD entries(refcode).

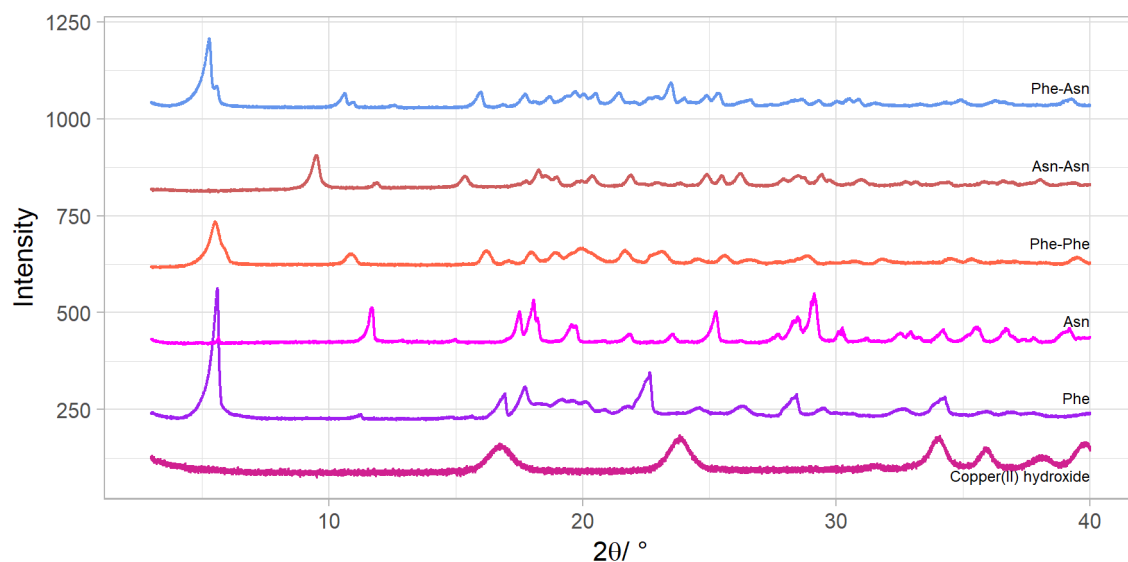

**Figure S11:** PXRD patterns of mechanochemically prepared samples of L-Phe and L-Asn with  $\text{Cu}(\text{OH})_2$  compared to calculated patterns derived from the belonging CSD entries(refcode).

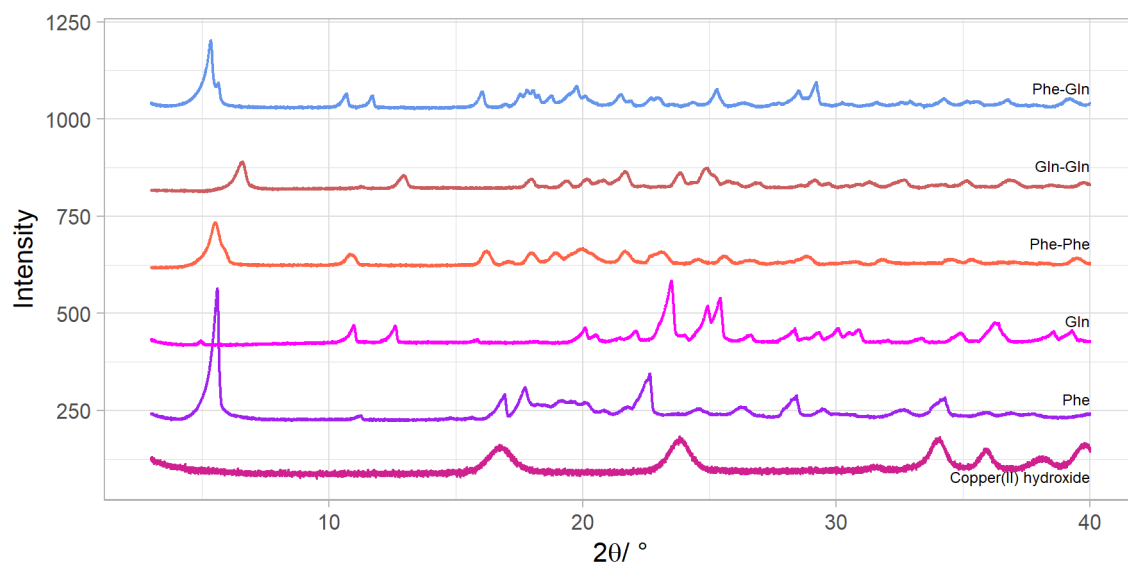

**Figure S12:** PXRD patterns of mechanochemically prepared samples of L-Phe and L-Gln with  $\text{Cu}(\text{OH})_2$  compared to calculated patterns derived from the belonging CSD entries(refcode).

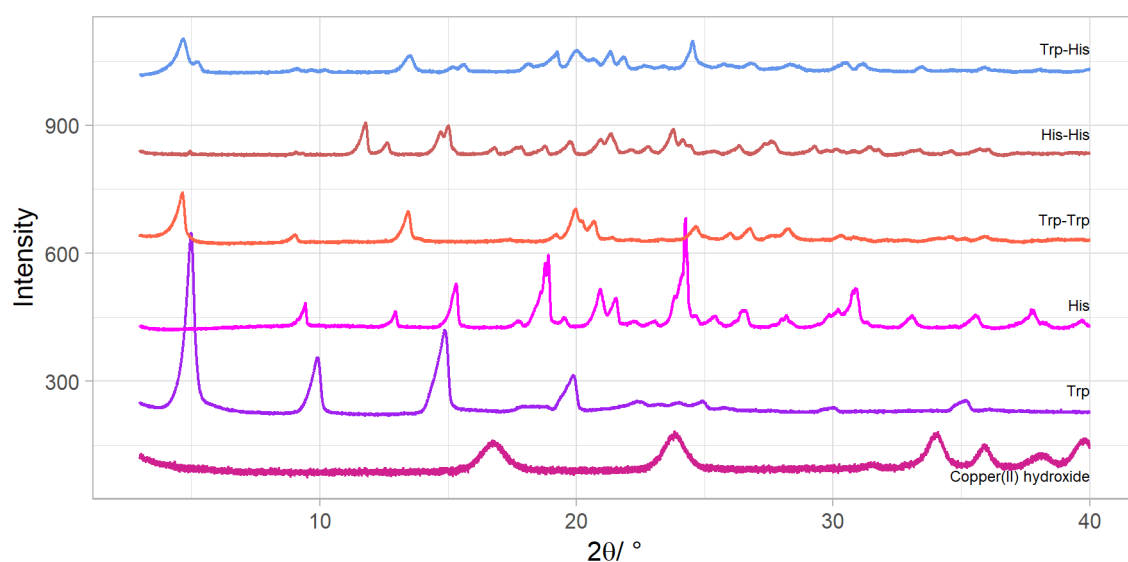

**Figure S13:** PXRD patterns of mechanochemically prepared samples of L-Trp and L-His with  $\text{Cu}(\text{OH})_2$  compared to calculated patterns derived from the belonging CSD entries(refcode).

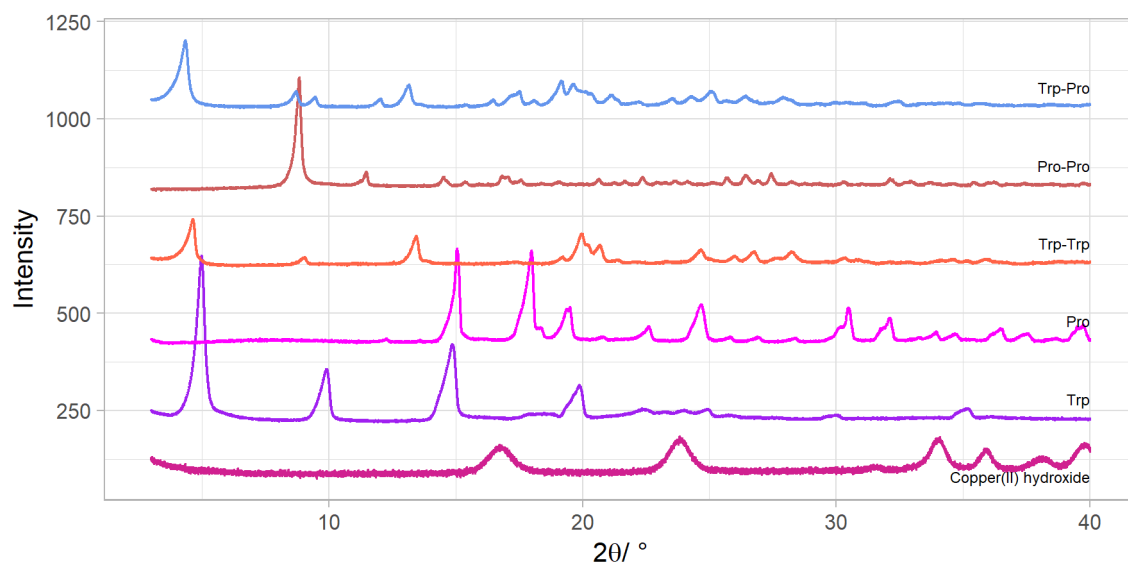

**Figure S14:** PXRD patterns of mechanochemically prepared samples of L-Trp and L-Pro with  $\text{Cu}(\text{OH})_2$  compared to calculated patterns derived from the belonging CSD entries(refcode).

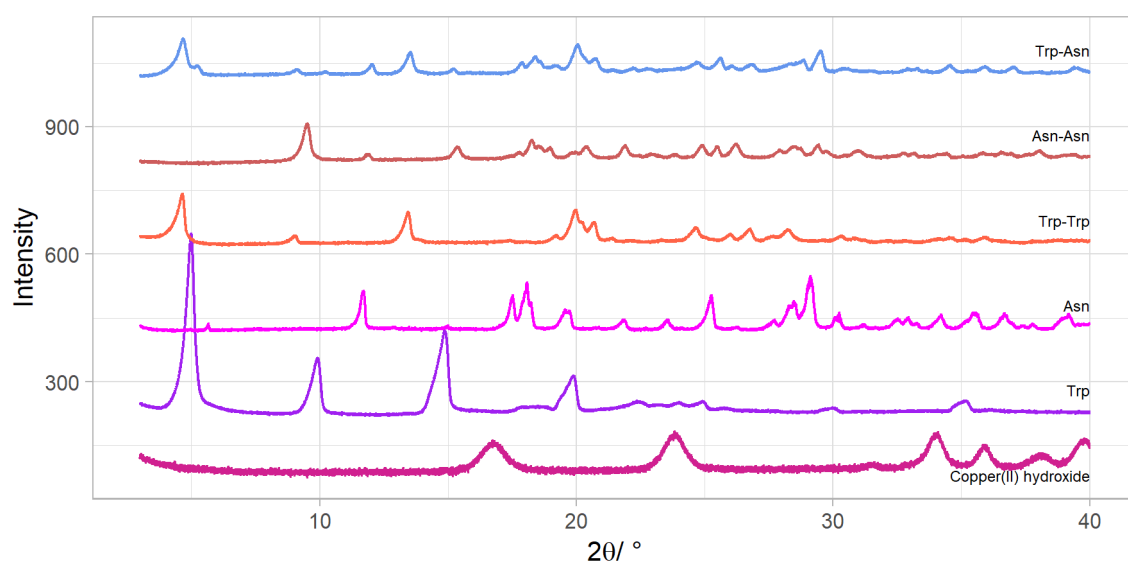

**Figure S15:** PXRD patterns of mechanochemically prepared samples of L-Trp and L-Asn with  $\text{Cu}(\text{OH})_2$  compared to calculated patterns derived from the belonging CSD entries(refcode).

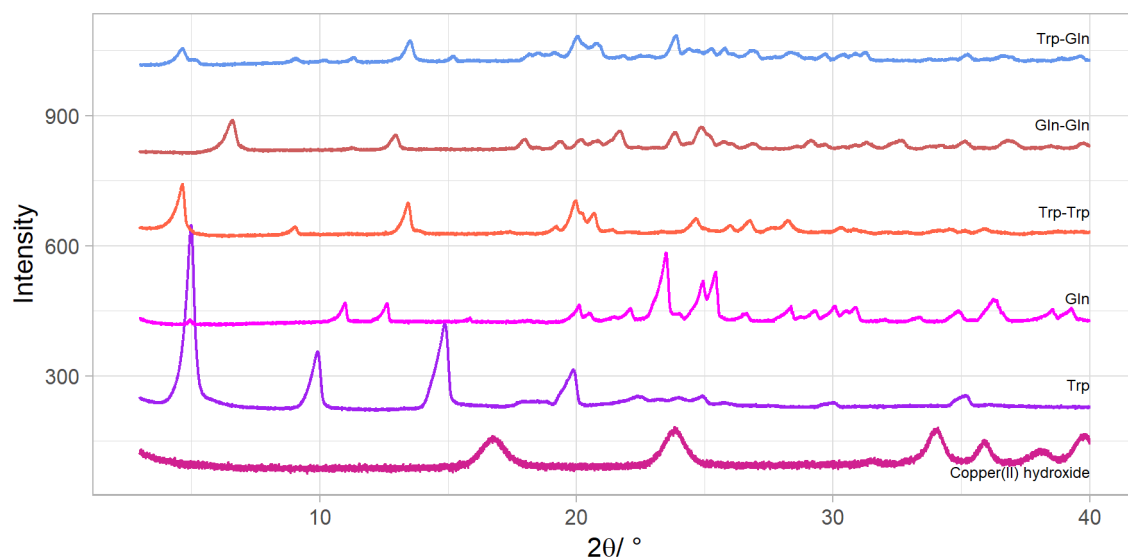

**Figure S16:** PXRD patterns of mechanochemically prepared samples of L-Trp and L-Gln with  $\text{Cu}(\text{OH})_2$  compared to calculated patterns derived from the belonging CSD entries(refcode).

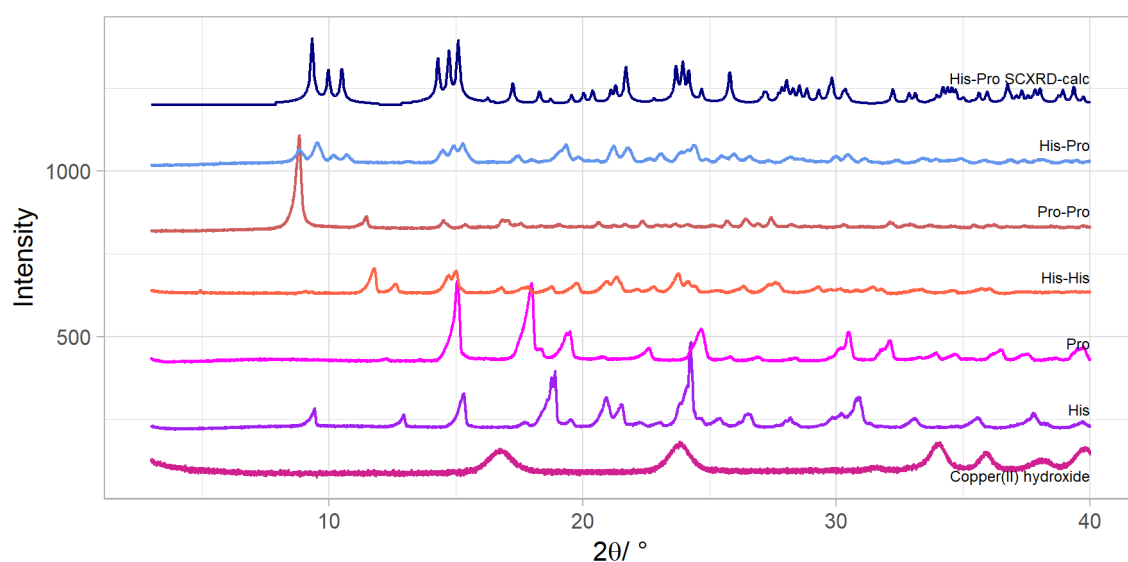

**Figure S17:** PXRD patterns of mechanochemically prepared samples of L-His and L-Pro with  $\text{Cu}(\text{OH})_2$  compared to calculated patterns derived from the belonging CSD entries(refcode).

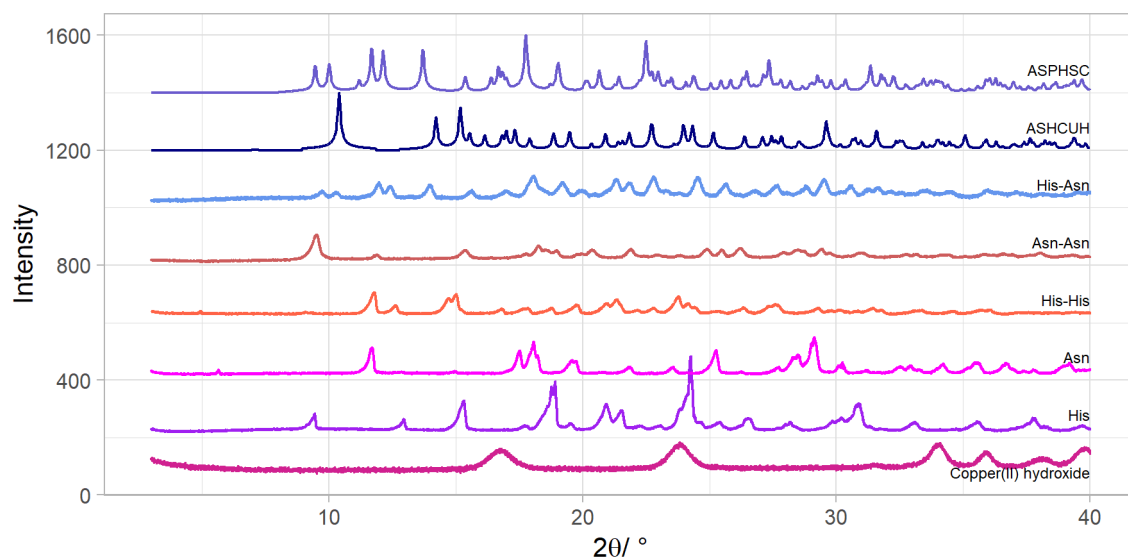

**Figure S18:** PXRD patterns of mechanochemically prepared samples of L-His and L-Asn with  $\text{Cu}(\text{OH})_2$  compared to calculated patterns derived from the belonging CSD entries(refcode).

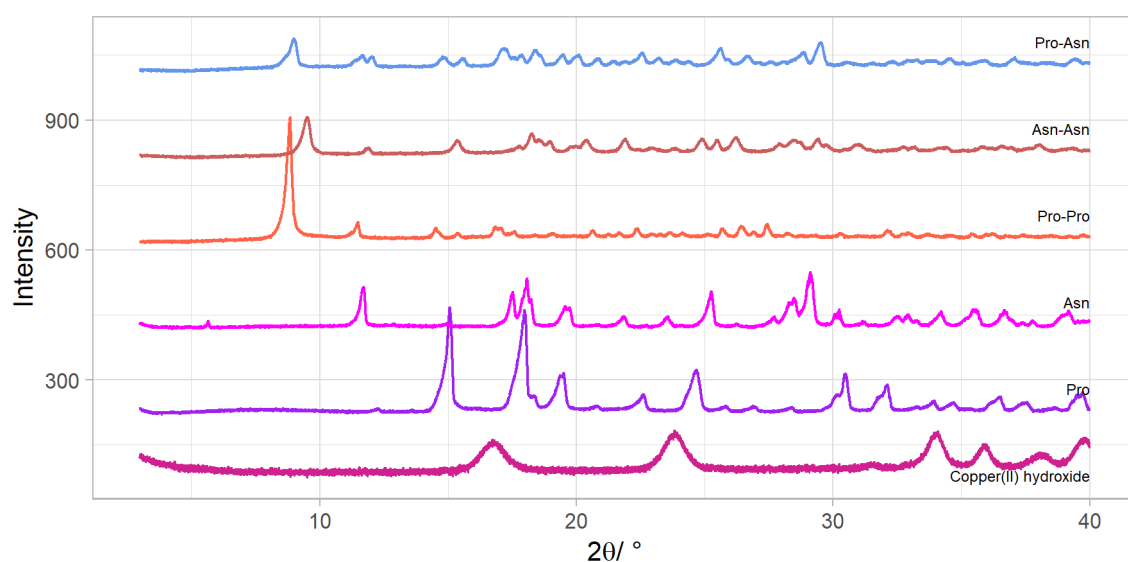

**Figure S19:** PXRD patterns of mechanochemically prepared samples of L-Pro and L-Asn with  $\text{Cu}(\text{OH})_2$  compared to calculated patterns derived from the belonging CSD entries(refcode).

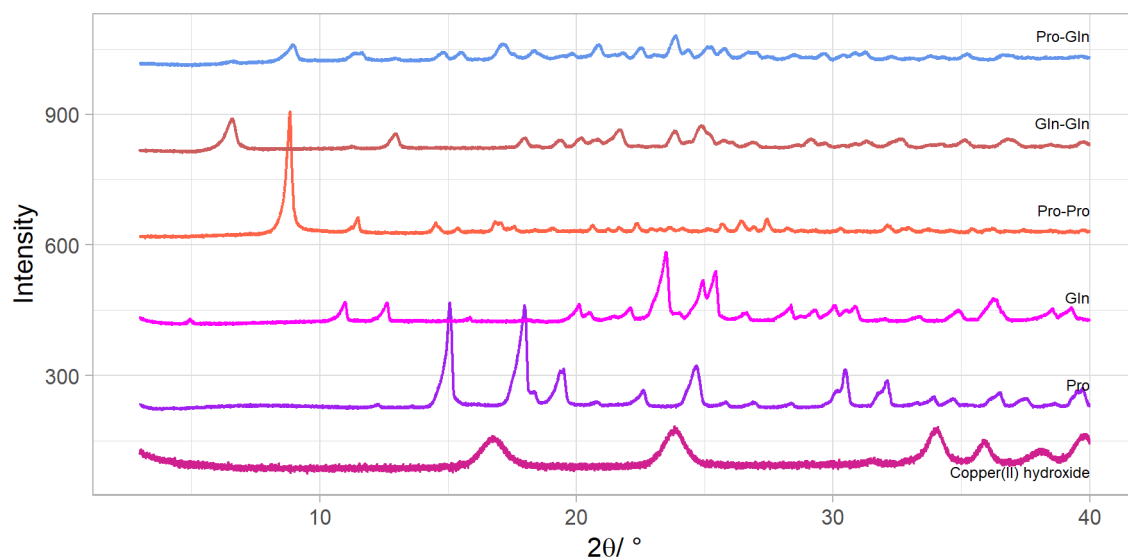

**Figure S20:** PXRD patterns of mechanochemically prepared samples of L-Pro and L-Gln with  $\text{Cu}(\text{OH})_2$  compared to calculated patterns derived from the belonging CSD entries(refcode).

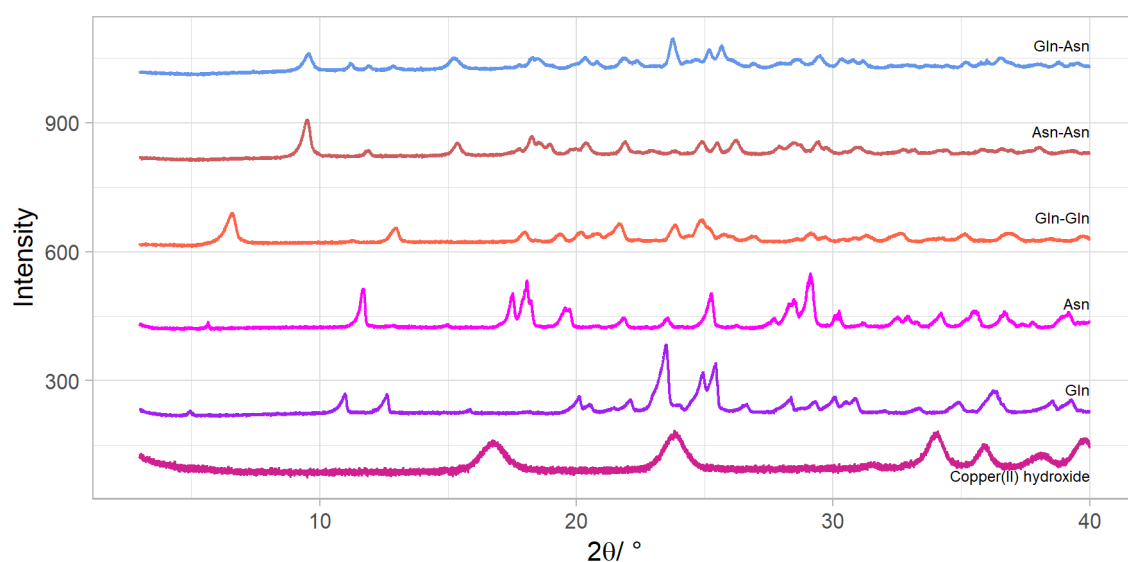

**Figure S21:** PXRD patterns of mechanochemically prepared samples of L-Asn and L-Gln with  $\text{Cu}(\text{OH})_2$  compared to calculated patterns derived from the belonging CSD entries(refcode).

## 4 References

### References

- (1) A. N. Agte and N. S. Golyenko, *Trudy Leningr. Khim.-Tekh. Inst.*, 1940, **8**, 140.
- (2) G. Brauer, *Handbook of Preparative Inorganic Chemistry* V2, Elsevier Science, Burlington, 1965, vol. 2.
- (3) Rigaku Oxford Diffraction, *CrysAllispro Software system v. 1.171.40 53 64-bit*, Oxford, UK: Rigaku Corporation, 2019.
- (4) G. M. Sheldrick, *Acta Crystallographica Section A Foundations of Crystallography*, 2007, **64**, 112–122.
- (5) G. M. Sheldrick, *Acta Crystallographica Section C Structural Chemistry*, 2015, **71**, 3–8.
- (6) O. V. Dolomanov, L. J. Bourhis, R. J. Gildea, J. A. K. Howard and H. Puschmann, *Journal of Applied Crystallography*, 2009, **42**, 339–341.
- (7) A. L. Spek, *Acta Crystallographica Section D Biological Crystallography*, 2009, **65**, 148–155.
- (8) C. F. Macrae, I. Sovago, S. J. Cottrell, P. T. A. Galek, P. McCabe, E. Pidcock, M. Platings, G. P. Shields, J. S. Stevens, M. Towler and P. A. Wood, *Journal of Applied Crystallography*, 2020, **53**, 226–235.
- (9) Schrödinger, LLC, “The PyMOL Molecular Graphics System, Version 1.8”, 2015.
- (10) H. Wickham, *ggplot2: Elegant Graphics for Data Analysis*, Springer-Verlag New York, 2016.
- (11) RStudio Team, *RStudio: Integrated Development Environment for R*, RStudio, PBC., Boston, MA, 2020.
